# Supplementary material for: Candidate SNP Markers of Atherogenesis Significantly Shifting the Affinity of TATA-Binding Protein for Human Gene Promoters Show Stabilizing Natural Selection as a Sum of Neutral Drift Accelerating Atherogenesis and Directional Natural Selection Slowing It
Source: MDPI journal article supplement (doi:10.3390/ijms21031045), 2020-02-05
Supplement: s1 [file s1]

## SUPPLEMENTARY MATERIALS

# Candidate SNP markers for atherogenesis significantly shifting the affinity of TATA-binding protein for human gene promoters show stabilizing natural selection as sum of neutral drift accelerating atherogenesis and directional natural selection slowing it

Mikhail Ponomarenko<sup>1,2\*</sup>, Dmitry Rasskazov<sup>1</sup>, Irina Chadaeva<sup>1,2</sup>, Ekaterina Sharypova<sup>1</sup>, Irina Drachkova<sup>1</sup>, Dmitry Oshchepkov<sup>1</sup>, Petr Ponomarenko<sup>1</sup>, Ludmila Savinkova<sup>1</sup>, Eugene Oshchepkova<sup>1</sup>, Maria Nazarenko<sup>3</sup>, Nikolay Kolchanov<sup>1,2</sup>

<sup>1</sup> Institute of Cytology and Genetics, Siberian Branch of Russian Academy of Sciences, Novosibirsk 630090, Russia; pon@bionet.nsc.ru;

<sup>2</sup> Novosibirsk State University, Novosibirsk 630090, Russia; ichadaeva@bionet.nsc.ru;

<sup>3</sup> Institute of Medical Genetics, Tomsk National Research Medical Center, Russian Academy of Science, Tomsk, 634009, Russia; maria.nazarenko@medgenetics.ru;

\* Correspondence: pon@bionet.nsc.ru. Tel.: +7 (383) 363-49-63 ext. 1311 (M.P.)

## S1. Supplementary DNA sequence analysis

Two DNA sequence  $S_{WT} = \{S_{WT;-90} \dots S_{WT;i} \dots S_{WT;-1}\}$  and  $S_{SNP} = \{S_{SNP;-90} \dots S_{SNP;i} \dots S_{SNP;-1}\}$ , which lengths are 90 bp that correspond to two variants of a given promoter located immediately upstream of the transcription start site (TSS,  $S_{1;0} = S_{2;0}$ ;  $S_i \in \{a, c, g, t\}$ ) are the input data of our earlier created Web service SNP\_TATA\_Comparator ([http://beehive.bionet.nsc.ru/cgi-bin/mgs/tatascan\\_fox/start.pl](http://beehive.bionet.nsc.ru/cgi-bin/mgs/tatascan_fox/start.pl)) [45] used, as shown in Figure 1c (hereinafter, see the main section “2. Results and Discussion”).

First of all, the affinity estimate “ $-\ln(K_D(S))$ ” is calculated upon each of these sequences  $S \in \{S_{WT}, S_{SNP}\}$ , as:

$$-\ln(K_D) = 10.9 - 0.2 \{ \ln(K_{SLIDE}) + \ln(K_{STOP}) + \ln(K_{BEND}) \}, \quad (1)$$

where 10.9 (ln units) and 0.2 corresponds to the estimates of nonspecific TBP-DNA affinity (i.e., 10 mM [181] and the stoichiometric coefficient [36];  $K_{STOP}$  as an empirical estimate of an impact of the TBP stops at the most probable TBP-binding site according to Bucher’s rule [182] namely:

$$\ln(K_{STOP}) = \underset{(+), (-)}{\text{MAX}}_{DNA \text{ chains}} \left\{ \sum_{j=-1}^{13} w_{j;S_{i+j}} \right\}; \quad (2)$$

where  $w_{js}$  as an element of the Bucher’s position-weight matrix [182], which corresponds to the case of the nucleotide  $s$  located within  $j$ -th position of the DNP sequence analyzed.

In Eq. (1),  $K_{SLIDE}$  as an empirical estimate of an impact of the TBP sliding along DNA near the most probable TBP-binding site mentioned above (i.e., DNA sequence region [TBP-DNA contact  $\pm 5$ bp]) is heuristically calculated, as:

$$-\ln(K_{SLIDE}) = \text{MEAN}_{[TBP-DNA \text{ contact} \pm 5bp]} \{0.8[TA] + 3.4\mu + 35.1\}, \quad (3)$$

where [TA] as as weighted number of dinucleotide TA;  $\mu$  as the arithmetical mean of the minor groove width of the DNA helix [183] of the TBP-binding site under consideration; 0.8, 3.4, and 35.1 as regression coefficients [34]

In Eq. (1),  $K_{\text{BEND}}$  as an empirical estimate of an impact of the DNA helix bend stabilizing TBP-DNA complex is calculated, namely:

$$-\ln(K_{\text{BEND}}) = \text{MEAN}_{\text{TBP-DNA}} \{0.9[\text{TA}, \text{AA}, \text{TG}, \text{AG}] + 2.5[\text{TA}, \text{TC}, \text{TG}] + 14.4\}, \quad (4)$$

where  $\text{MEAN}_{\text{TBP-DNA}}$  as the arithmetical mean of both DNA strands of the TBP-DNA complex under consideration (see Eq. (2)); 0.9, 2.5, and 14.4 as regression coefficients [34].

Additionally, the “ $-\ln[K_D]$ ” values (Eq. 1) are accompanied by its standard deviation estimates ( $\delta$ ) according to all the possible nucleotide substitutions,  $s_{\bullet,j} \rightarrow \xi$ , at each position  $j$  of the above regions [TBP-DNA contact  $\pm 5\text{bp}$ ], such as:

$$\delta(S_{\bullet}) = [(\sum_{1 \leq i \leq 26} \sum_{\xi \in \{a,c,g,t\}} [\ln(K_D(\{s_{\bullet,j-13} \dots \xi \dots s_{\bullet,j+12}\}) / K_D(\{s_{\bullet,j-13} \dots s_{\bullet,j} \dots s_{\bullet,j+12}\}))^2]) / (3 \cdot 26)]^{1/2} \quad (5)$$

Finally, two estimates “ $-\ln(K_D(S_{\text{WT}})) \pm \delta(S_{\text{WT}})$ ” and “ $-\ln(K_D(S_{\text{SNP}})) \pm \delta(S_{\text{SNP}})$ ” calculated upon the input sequences  $S_{\text{WT}}$  and  $S_{\text{SNP}}$  (Eqs. (1–5)) were statistically compared with one another in the terms of Fisher’s Z-score, such as:

$$Z = \text{abs}[\ln(K_{\text{WT};D} / K_{\text{SNP};D})] / [\delta_{\text{WT}}^2 + \delta_{\text{SNP}}^2]^{1/2}. \quad (6)$$

where  $Z$  as the above Z-score pinpointing  $p$ -value of the probability estimate of acceptance of the  $H_0$ -hypothesis “ $H_0: K_D(S_{\text{WT}}) \neq K_D(S_{\text{SNP}})$ ”, which was taken from the commonly accepted statistical package R [59].

On this basis, the final decision is made at its statistically significant level  $\alpha < 0.05$  (where  $\alpha = 1 - p$ ), namely:

**IF** {INEQUALITY “ $-\ln(K_{\text{WT};D}) > -\ln(K_{\text{SNP};D})$ ” is statistically significant},

**THEN** {DECISION is “ $S_{\text{SNP}}$  provides an underexpression of a given gene in comparison with  $S_{\text{WT}}$ , which is the norm”};

**ELSE IF** {INEQUALITY “ $-\ln(K_{\text{WT};D}) < -\ln(K_{\text{SNP};D})$ ” is statistically significant},

**THEN** {DECISION is “ $S_{\text{SNP}}$  provides an overexpression of a given gene in comparison with  $S_{\text{WT}}$ , which is the norm”},

**OTHERWISE** {DECISION is “alteration of the expression of this gene is insignificant”}.

One can see this DECISION in Figure 1c, such as: the text box “Result”, the line “DECISION”.

## S2. Supplementary *in vitro* measurements

Recombinant full-length human TBP was expressed in *Escherichia coli* BL21 (DE3) cells transformed with the pAR3038-TBP plasmid (a kind gift from Prof. B. Pugh, Pennsylvania State University) by a previously described method [184] with two modifications: the IPTG concentration was 1.0 instead of 0.1 mM; the induction time was 3 instead of 1.5 h. For details of our protocol for production and purification of human TBP, see ref. [40].

ODNs 26 bp in length were synthesized by the Biosynthesis Enterprise (Novosibirsk, Russia) and were purified by PAGE. Labeled double-stranded ODNs were prepared by  $^{32}\text{P}$  labeling of both strands by means of T4 polynucleotide kinase (SibEnzyme, Novosibirsk) with subsequent annealing by heating to  $95^\circ\text{C}$  (at equimolar concentrations) and slow cooling (no less than 3 h) to room temperature. The duplexes were analyzed in a 15% nondenaturing polyacrylamide gel (1 × Tris-borate-EDTA buffer) and isolated by electroelution. For more details of our protocol for labeling of ODNs with  $^{32}\text{P}$ , readers can see Ref. [40].

The equilibrium dissociation constants ( $K_D$ ) were determined for the complexes of TBP with each 26-bp ODN in question. Experiments on association kinetics were conducted at four ODN concentrations (Figure 3a). The experiments with TBP–ODN binding were carried out at 25°C in binding buffer (20 mM 4-[2-hydroxyethyl]-1-piperazineethanesulfonic acid [HEPES]–KOH pH 7.6, 5 mM MgCl<sub>2</sub>, 70 mM KCl, 1 mM dithiothreitol (DTT), 100 µg/mL BSA, 0.01% of NP-40, and 5% of glycerol) at a fixed concentration (0.3 nM) of active TBP. The gels were dried, and Imaging Screen-K (Kodak, Rochester, NY, USA) was exposed to these gels for analysis on a Molecular Imager PharoSFX Plus phosphorimager (Bio-Rad, Herts, UK). The resulting autoradiographs were quantitated in the Quantity One 4.5.0 software (Bio-Rad) as displayed in Figures 3b. Using these data as input for publicly available software Graph-Pad Prism 5 (<http://graphpad-prism.software.informer.com/5.01>), we calculated the equilibrium dissociation constant ( $K_D$ ).

For more details of our protocol for *in vitro* measurements of the equilibrium dissociation constant for TBP–ODN complexes, one can see Ref. [41].

## References

34. Ponomarenko, M., Ponomarenko, J., Frolov, A., Podkolodny, N., Savinkova, L., Kolchanov, N., Overton, G. Identification of sequence-dependent features correlating to activity of DNA sites interacting with proteins. *Bioinformatics*. **1999**; *15*, 687–703.
36. Ponomarenko, P., Savinkova, L., Drachkova, I., Lysova, M., Arshinova, T., Ponomarenko, M., Kolchanov, N. A step-by-step model of TBP/TATA box binding allows predicting human hereditary diseases by single nucleotide polymorphism. *Dokl. Biochem. Biophys.* **2008**; *419*, 88–92.
40. Savinkova, L., Drachkova, I., Arshinova, T., Ponomarenko, P., Ponomarenko, M., Kolchanov, N. An experimental verification of the predicted effects of promoter TATA-box polymorphisms associated with human diseases on interactions between the TATA boxes and TATA-binding protein. *PLoS One*. **2013**; *8*, e54626.
41. Drachkova, I., Savinkova, L., Arshinova, T., Ponomarenko, M., Peltek, S., Kolchanov, N. The mechanism by which TATA-box polymorphisms associated with human hereditary diseases influence interactions with the TATA-binding protein. *Hum. Mutat.* **2014**; *35*, 601–608.
45. Ponomarenko, M., Rasskazov, D., Arkova, O., Ponomarenko, P., Suslov, V., Savinkova, L., Kolchanov, N. How to use SNP\_TATA\_Comparator to find a significant change in gene expression caused by the regulatory SNP of this gene's promoter via a change in affinity of the TATA-binding protein for this promoter. *Biomed. Res. Int.* **2015**; *2015*, 359835.
181. Hahn, S., Buratowski, S., Sharp, P., Guarente, L. Yeast TATA-binding protein TFIID binds to TATA elements with both consensus and nonconsensus DNA sequences. *Proc. Natl. Acad. Sci. USA*. **1989**; *86*, 5718–5722.
182. Bucher, P. Weight matrix descriptions of four eukaryotic RNA polymerase II promoter elements derived from 502 unrelated promoter sequences. *J. Mol. Biol.* **1990**; *212*, 563–578.
183. Karas, H., Knuppel, R., Schulz, W., Sklenar, H., Wingender, E. Combining structural analysis of DNA with search routines for the detection of transcription regulatory elements. *Comput. Applic. Biosci.* **1996**; *12*, 441–446.
184. Pugh, B. Purification of the human TATA-binding protein, TBP. *Methods Mol. Biol.* **1995**; *37*, 359–367.

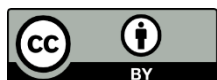

© 2019 by the authors. Submitted for possible open access publication under the terms and conditions of the Creative Commons Attribution (CC BY) license (<http://creativecommons.org/licenses/by/4.0/>).
